# Supplementary material for: BBCA: Improving the scalability of *BEAST using random binning
Source: PubMed Central journal article supplement (PMC4239591; doi:10.1186/1471-2164-15-s6-s11), 2014-10-17

RESEARCH

# Supplementary materials for “BBCA: Improving the scalability of \*BEAST using random binning”

Théo Zimmermann, Siavash Mirarab and Tandy Warnow\*

\*Correspondence:  
warnow@illinois.edu  
Full list of author information is  
available at the end of the article

**Table 1** List of taxon sampling for the Laurasiatheria datasets.

| 3-letter code | Species             | Common Name |
|---------------|---------------------|-------------|
| VIC           | Vicugna pacos       | Alpaca      |
| BOS           | Bos taurus          | Cow         |
| SUS           | Sus scrofa          | Pig         |
| EQU           | Equus caballus      | Horse       |
| CAN           | Canis familiaris    | Dog         |
| FEL           | Felis catus         | Cat         |
| TUR           | Tursiops truncatus  | Dolphin     |
| ERI           | Erinaceus europaeus | Hedgehog    |
| PTE           | Pteropus vampyrus   | Megabat     |
| MYO           | Myotis lucifugus    | Microbat    |
| SOR           | Sorex araneus       | Shrew       |
| HOM           | Homo sapiens        | Human       |

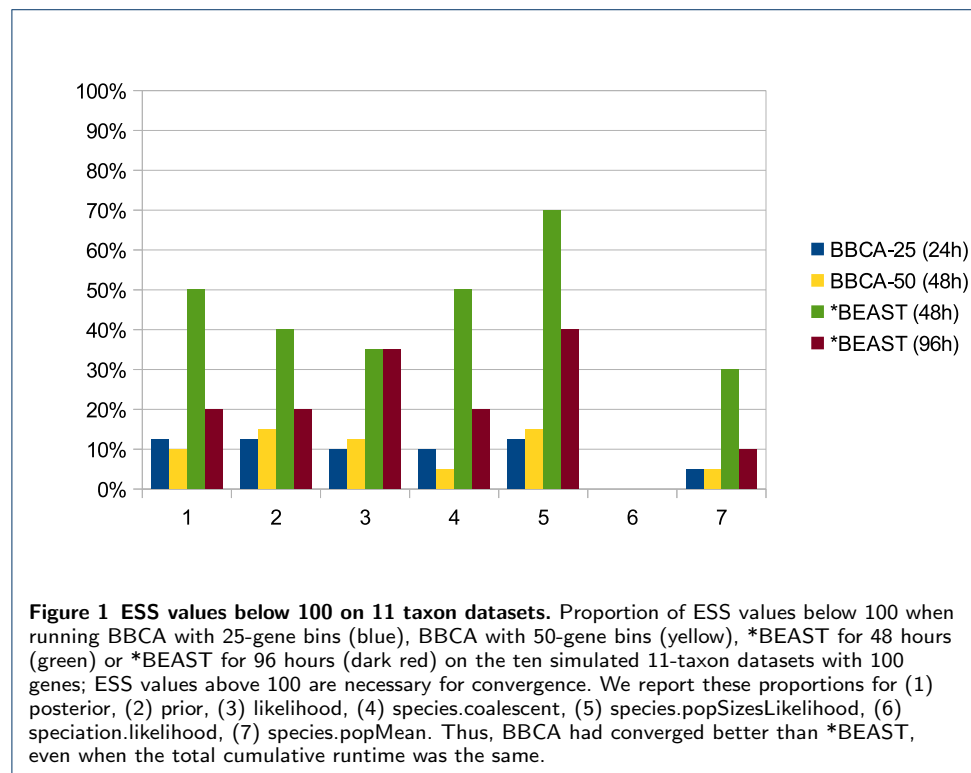

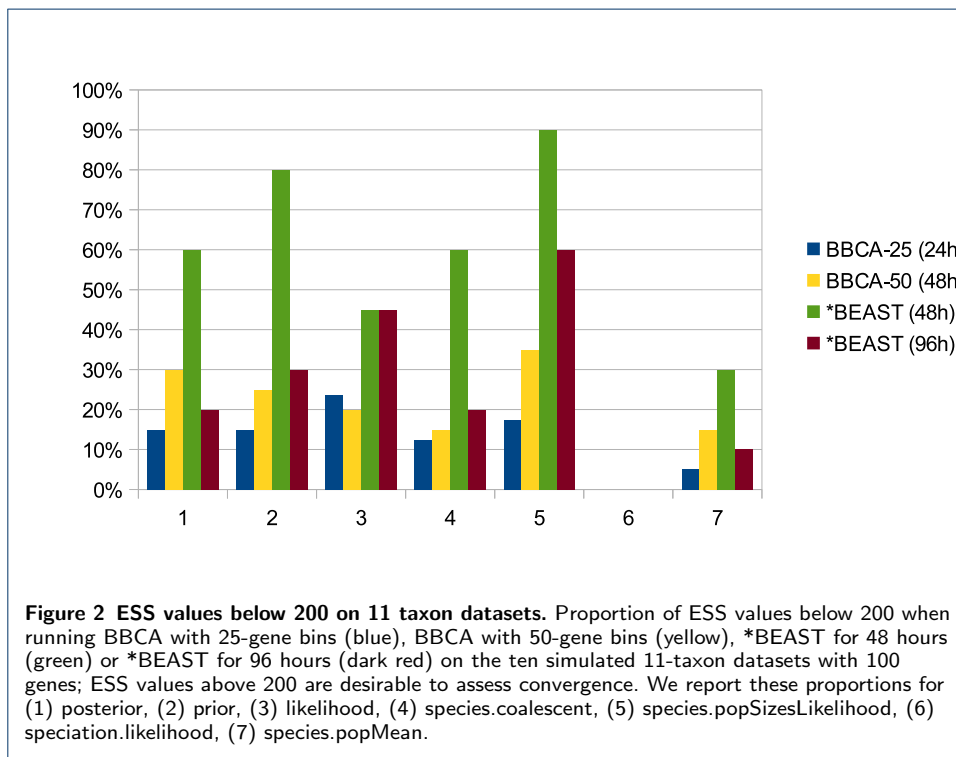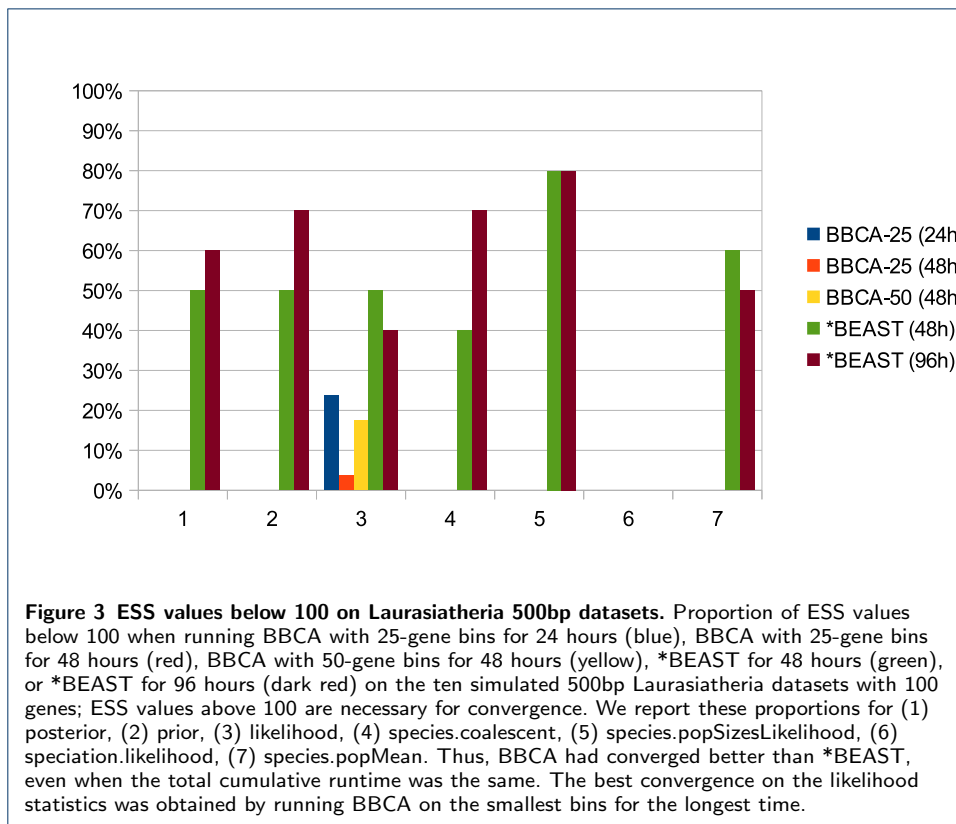

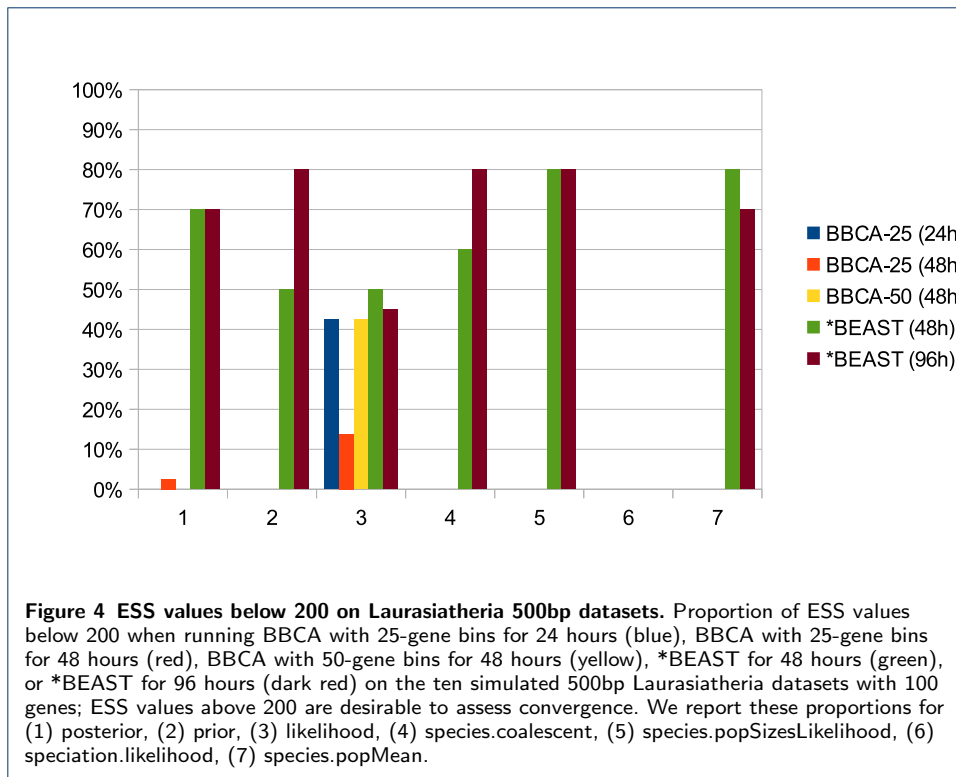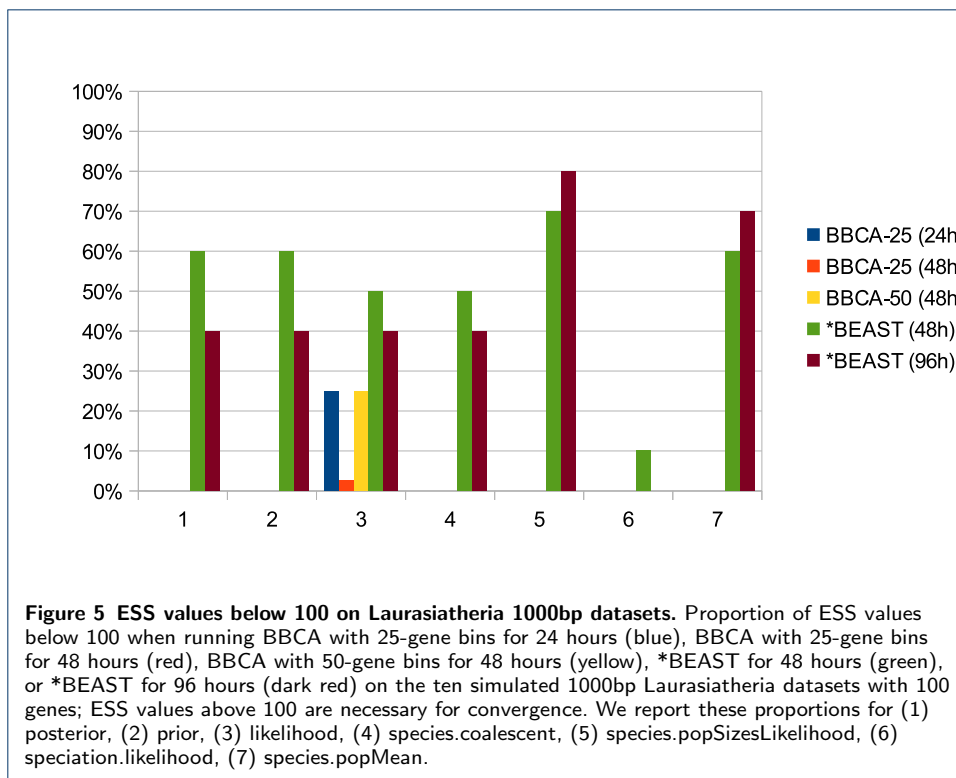

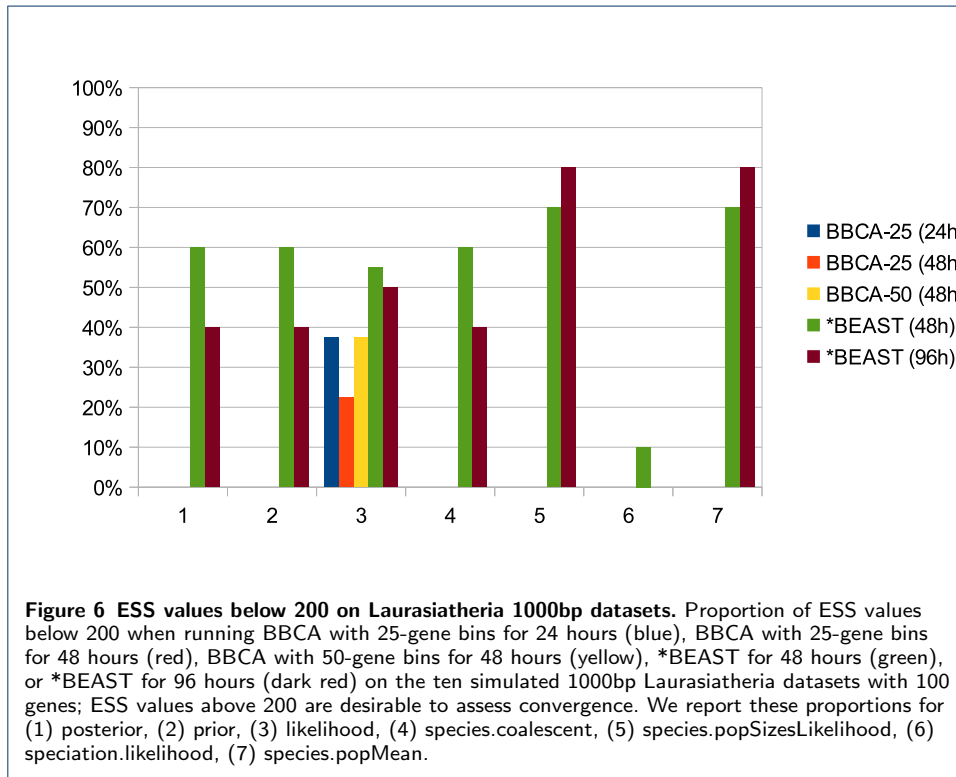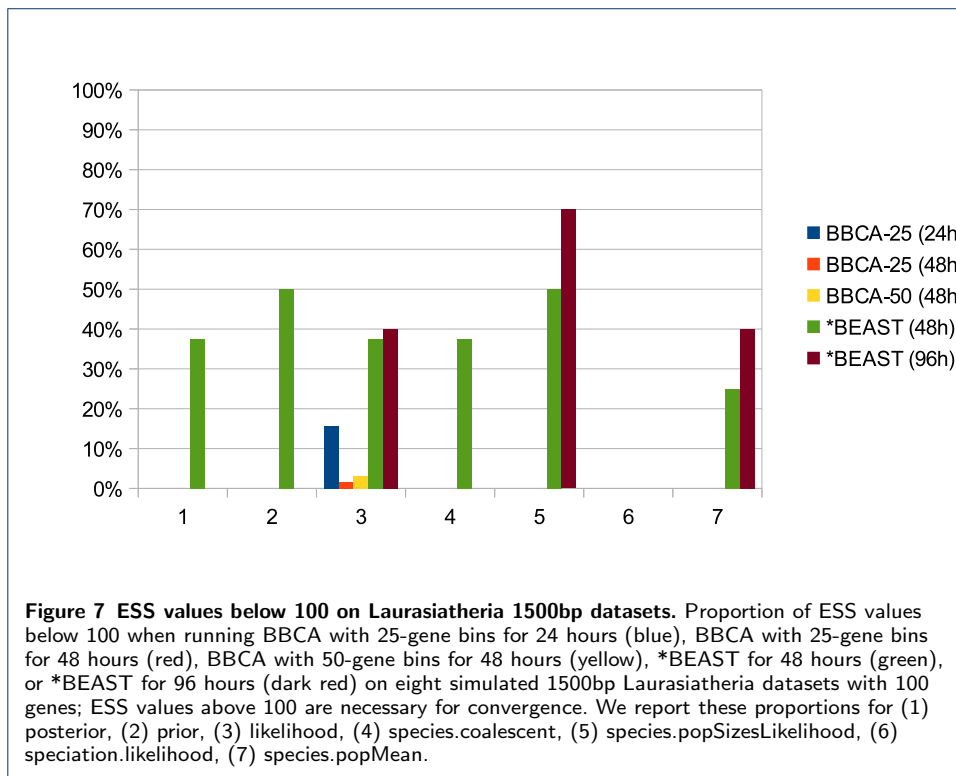

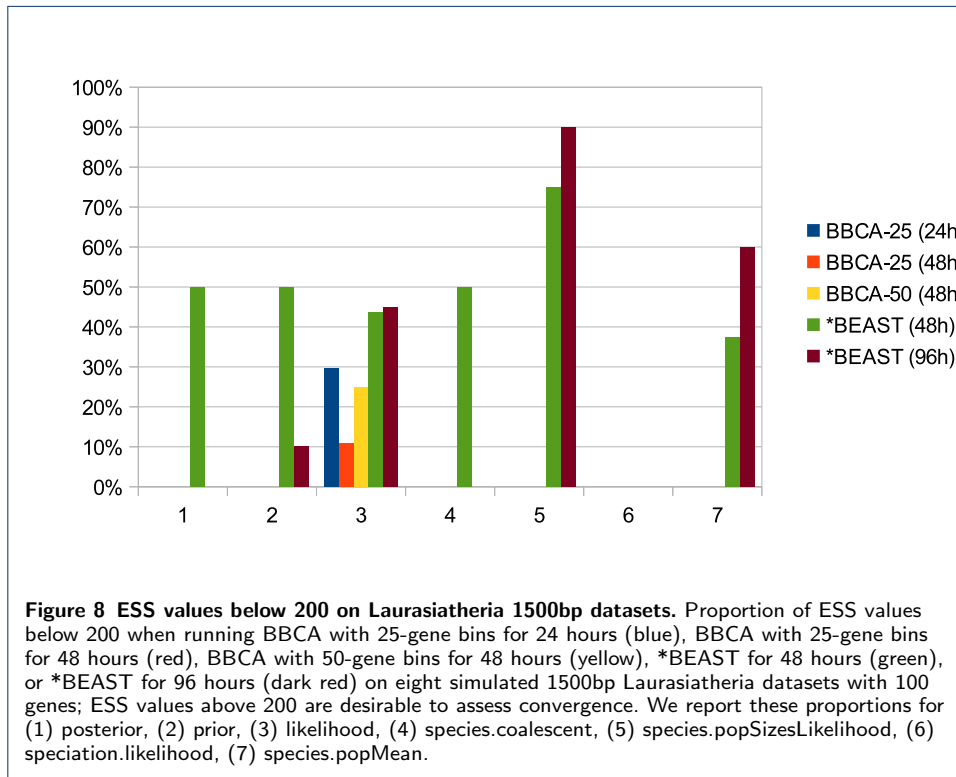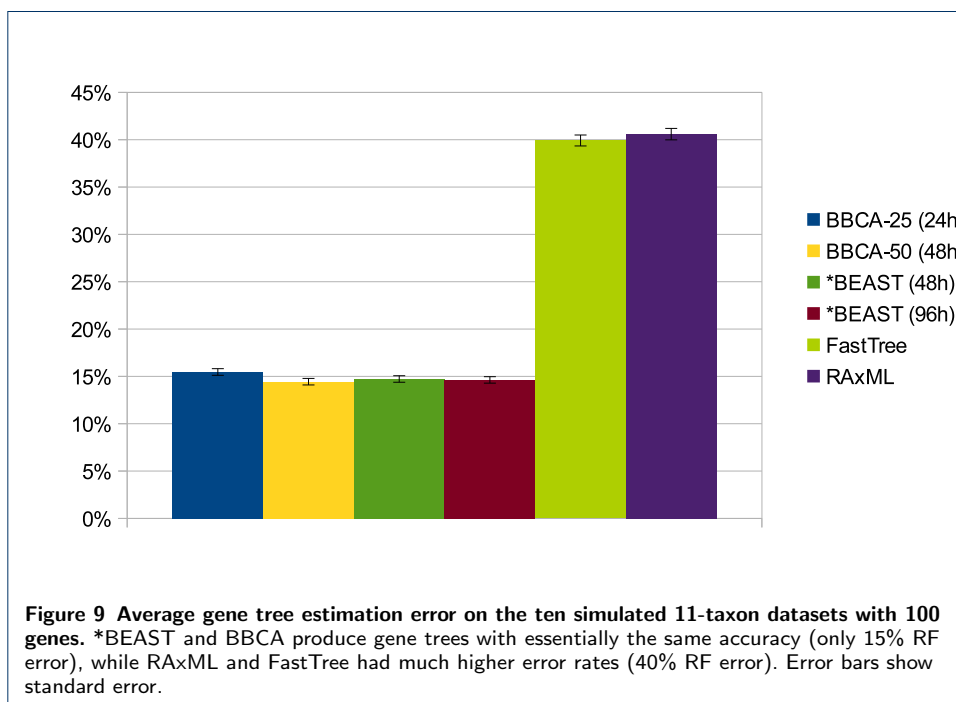

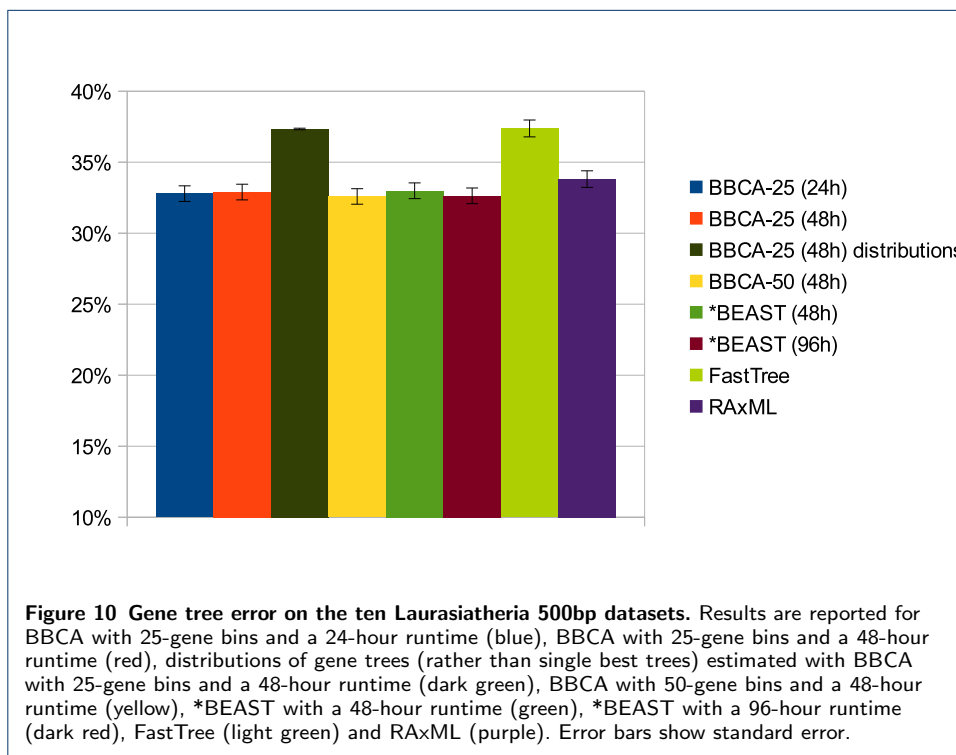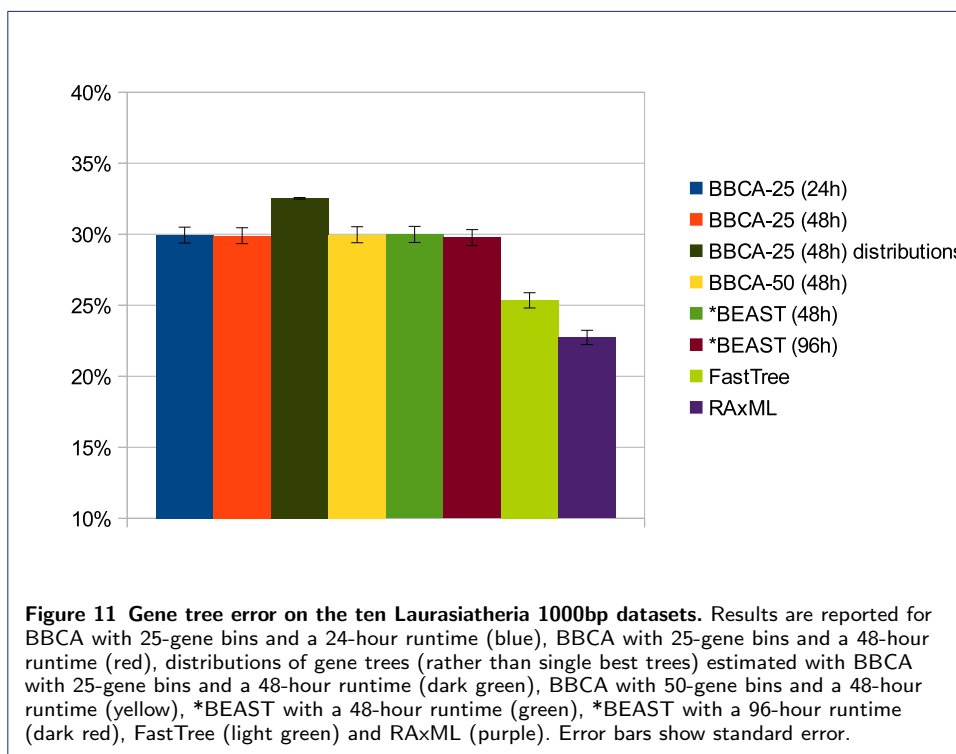

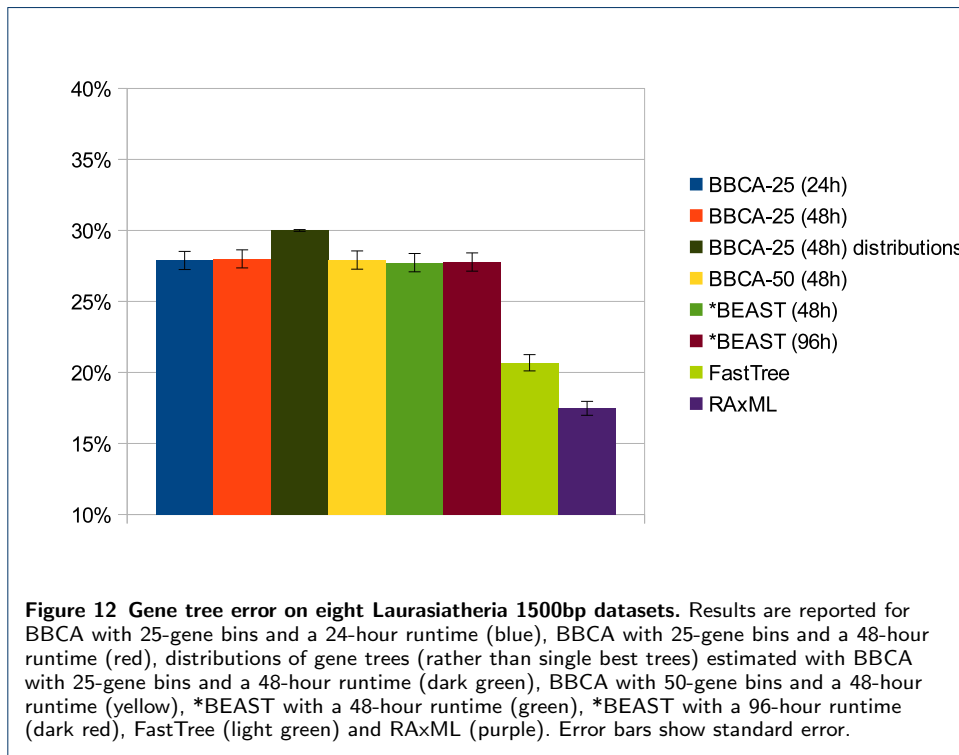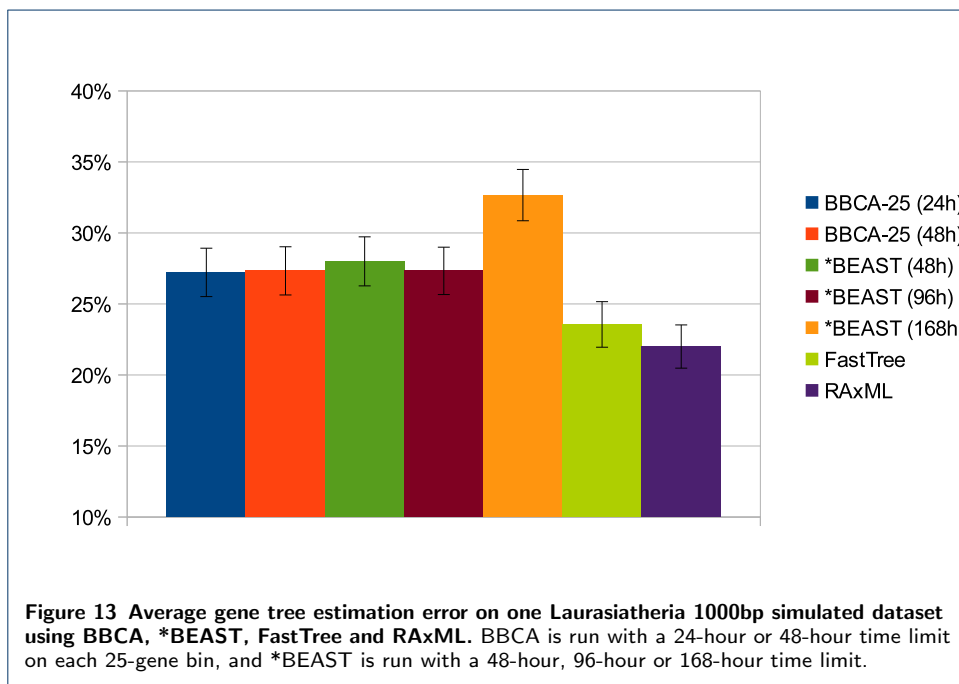

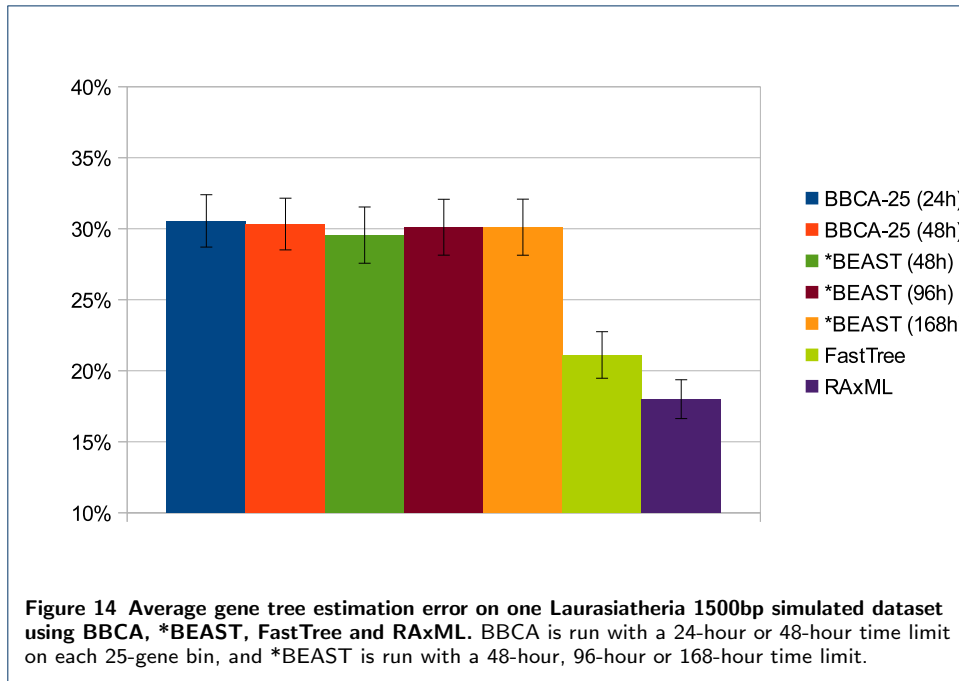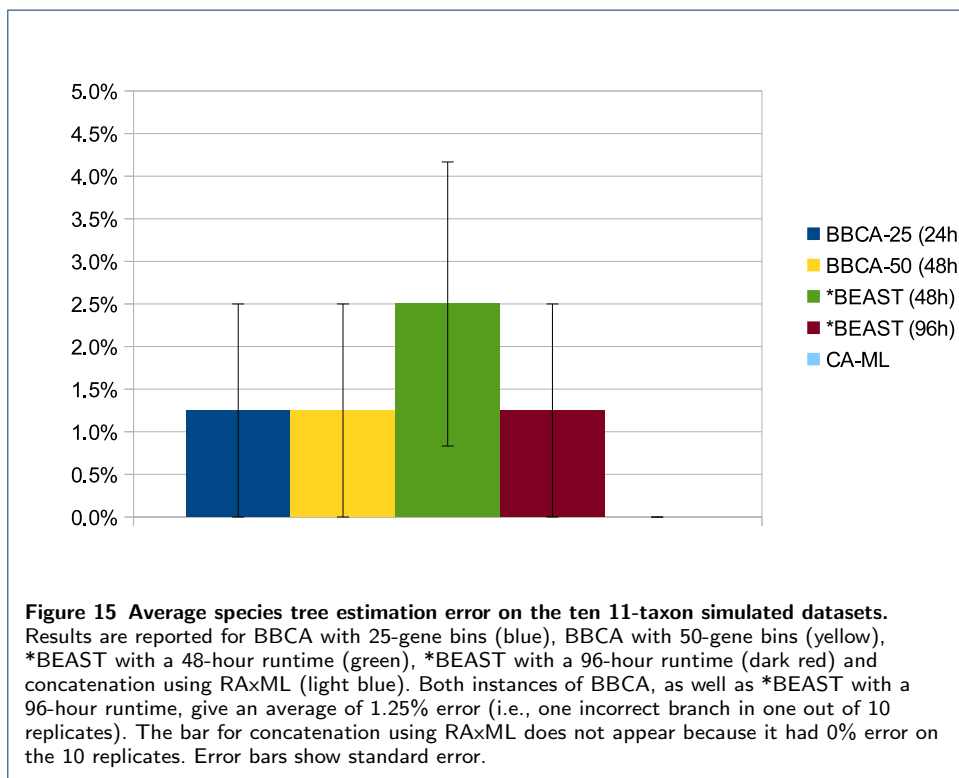



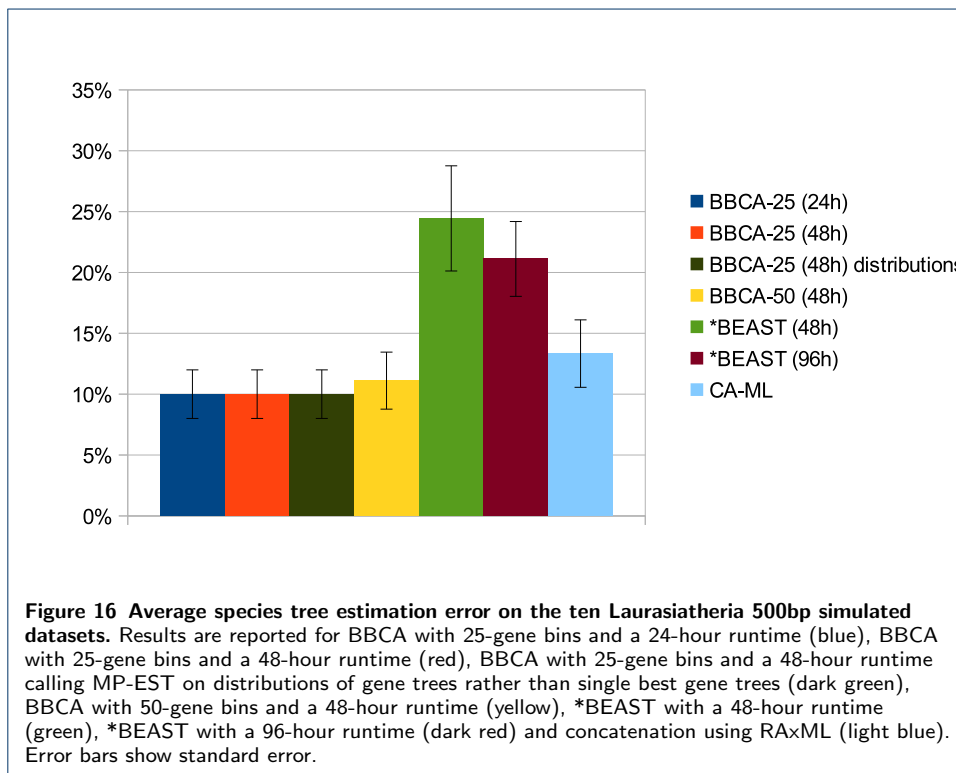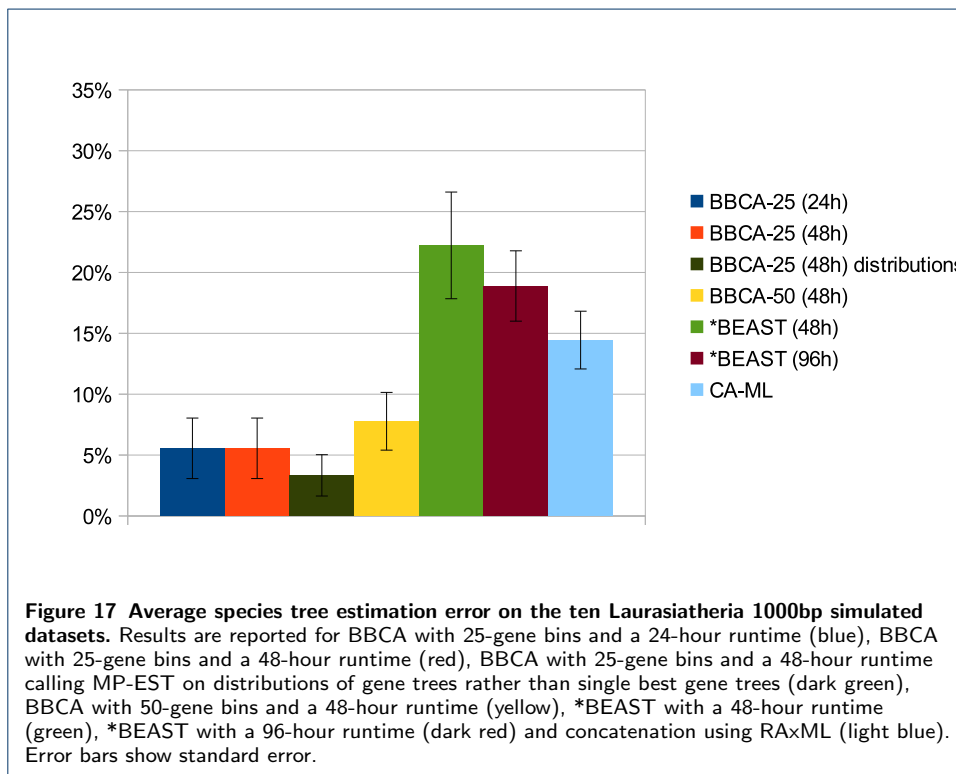

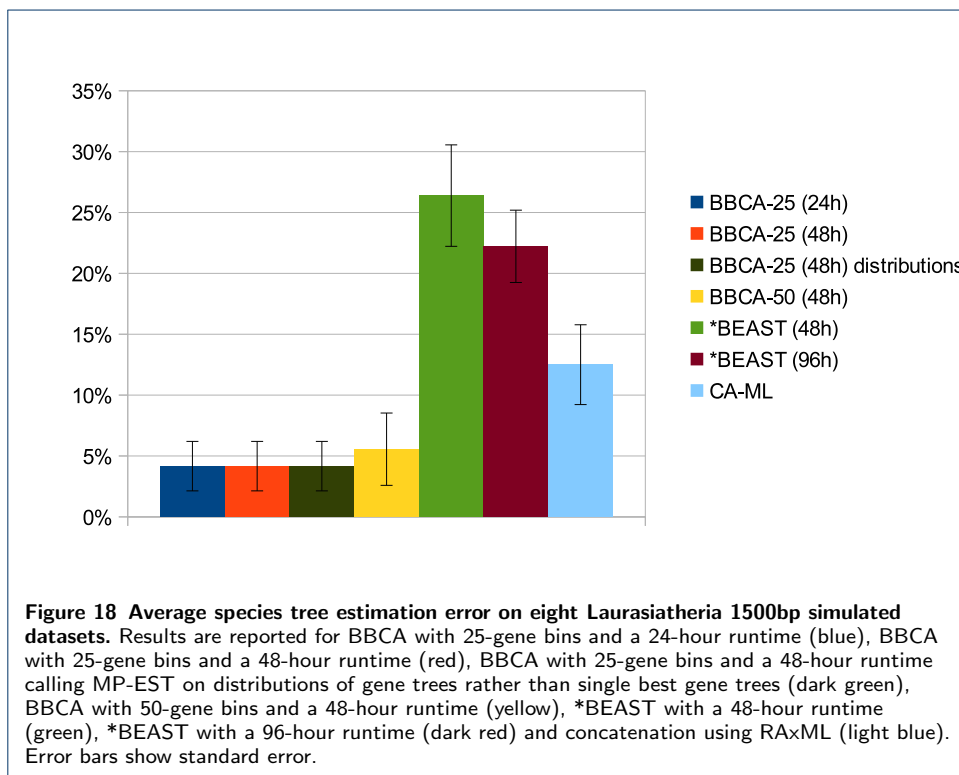

Supplement: 1471-2164-15-S6-S11-S1.pdf [file 1471-2164-15-S6-S11-S1.pdf]
